# Supplementary material for: Charge Carrier Formation following Energy Gap Law in Photo-Activated Organic Materials for Efficient Solar Cells
Source: MDPI journal article supplement (doi:10.3390/en17092114), 2024-04-28
Supplement: s1 [file s1]

## Supplementary Information

# Charge Carrier Formation following Energy Gap Law in Photo-Activated Organic Materials for Efficient Solar Cells

Aniket Rana <sup>1,2,\*,†</sup>, Nikita Vashistha <sup>2,3,†</sup>, Amit Kumar <sup>2,4†</sup>, Mahesh Kumar <sup>2,5\*</sup> and Rajiv K. Singh <sup>2,4,\*</sup>

<sup>1</sup> Department of Chemistry and Centre for Processable Electronics, Imperial College London, London W12 0BZ, UK

<sup>2</sup> Academy of Scientific and Innovative Research (AcSIR), CSIR-NPL Campus, New Delhi 110012, India; nikita.vashistha@uni-jena.de (N.V.); kumaramitiitg004@gmail.com (A.K.)

<sup>3</sup> Institute of Physical Chemistry, Friedrich Schiller University Jena, Helmholtzweg, 4, 07743 Jena, Germany

<sup>4</sup> CSIR – National Physical Laboratory, Dr. K.S. Krishnan Marg, New Delhi 110012, India

<sup>5</sup> Innovation and Management Directorate Council of Scientific and Industrial Research, Anusandhan Bhawan, New Delhi 110001, India

\* Correspondence: aniket.rana@imperial.ac.uk (A.R.); rajivsingh@nplindia.org (R.K.S.); mkumar@csir.res.in (M.K.)

† These authors contributed equally to this work.

Keyword: organic solar cell, carrier dynamics, energy gap law

**Table S1** The lifetime of excited carriers and associated pre-exponential amplitude for  $DTS(FBTTh_2)_2$  and  $DTS(FBTTh_2)_2:PC[70]BM$  at different wavelength after multi-exponential fitting.

| <b><math>DTS(FBTTh_2)_2</math></b>          |            |            |            |             |             |             |
|---------------------------------------------|------------|------------|------------|-------------|-------------|-------------|
| <b><math>\lambda(nm)</math></b>             | <b>469</b> | <b>595</b> | <b>714</b> | <b>1078</b> | <b>1195</b> | <b>1294</b> |
| <b>A1</b>                                   | 0.696      | -0.683     | -0.688     | 0.631       | 0.688       | 0.638       |
| <b><math>\tau_1(ps)</math></b>              | 0.982      | 1.43       | 1.54       | 3.07        | 2.57        | 2.87        |
| <b>A2</b>                                   | 0.247      | -0.237     | -0.184     | 0.327       | 0.293       | 0.359       |
| <b><math>\tau_2(ps)</math></b>              | 19.1       | 28.4       | 46.1       | 47.9        | 31.7        | 37.7        |
| <b>A3 (offset)</b>                          | 0.057      | -0.0807    | -0.128     | 0.0418      | 0.0189      | 0.0032      |
| <b><math>DTS(FBTTh_2)_2:PC[70]BM</math></b> |            |            |            |             |             |             |
| <b><math>\lambda(nm)</math></b>             | <b>593</b> | <b>648</b> | <b>771</b> | <b>989</b>  | <b>1116</b> | <b>1311</b> |
| <b>A1</b>                                   | -0.339     | -0.344     | 0.518      | 0.308       | 0.173       | 0.237       |
| <b><math>\tau_1(ps)</math></b>              | 6.31       | 4.05       | 1.9        | 2.69        | 3.16        | 1.94        |
| <b>A2</b>                                   | -0.311     | -0.255     | 0.354      | 0.15        | 0.253       | 0.155       |
| <b><math>\tau_2(ps)</math></b>              | 62.2       | 57.9       | 44.7       | 229         | 209         | 261         |
| <b>A3</b>                                   | -0.232     | -0.205     | 0.098      | 0.313       | 0.349       | 0.36        |
| <b><math>\tau_3(ps)</math></b>              | 1560       | 1200       | 1130       | 1980        | 2220        | 3060        |

**Table S2** The lifetime of excited carriers and associated pre-exponential amplitude for  $PCE10$  and  $PCE10:PC[70]BM$  at different wavelength after multi-exponential fitting.

| <b>PCE10</b>                    |            |            |            |            |            |             |             |
|---------------------------------|------------|------------|------------|------------|------------|-------------|-------------|
| <b><math>\lambda(nm)</math></b> | <b>581</b> | <b>648</b> | <b>708</b> | <b>741</b> | <b>866</b> | <b>958</b>  | <b>1119</b> |
| <b>A1</b>                       | -0.816     | -0.764     | -0.71      | -0.659     | 0.8        | 0.717       | 0.603       |
| <b><math>\tau_1(ps)</math></b>  | 0.392      | 0.527      | 0.771      | 0.99       | 0.458      | 0.59        | 0.908       |
| <b>A2</b>                       | -0.153     | -0.144     | -0.144     | -0.168     | 0.12       | 0.181       | 0.242       |
| <b><math>\tau_2(ps)</math></b>  | 15.5       | 18.4       | 17.3       | 159        | 19.5       | 21.5        | 31.5        |
| <b>A3 (offset)</b>              | -0.0307    | -0.0757    | -0.107     | 0.112      | 0.0604     | 0.0925      | 0.119       |
| <b>PCE10:PC[70]BM</b>           |            |            |            |            |            |             |             |
| <b><math>\lambda(nm)</math></b> | <b>661</b> | <b>702</b> | <b>775</b> | <b>877</b> | <b>979</b> | <b>1072</b> |             |
| <b>A1</b>                       | -0.524     | -0.562     | 0.605      | 0.378      | 0.317      | 0.263       |             |
| <b><math>\tau_1(ps)</math></b>  | 1.9        | 1.7        | 1.43       | 1.71       | 1.45       | 2.59        |             |
| <b>A2</b>                       | -0.19      | -0.188     | 0.329      | 0.314      | 0.28       | 0.227       |             |
| <b><math>\tau_2(ps)</math></b>  | 52.7       | 55.2       | 19.3       | 38         | 44.9       | 47.3        |             |
| <b>A3</b>                       | -0.225     | -0.191     | -0.0661    | 0.226      | 0.296      | 0.392       |             |
| <b><math>\tau_3(ps)</math></b>  | 867        | 910        | inf        | 884        | 1040       | 979         |             |

**Table S3** The lifetime of excited carriers and associated pre-exponential amplitude for PCDTBT and PCDTBT:PC[70]BM at different wavelength after multi-exponential fitting.

| <b>PCDTBT</b>                   |            |            |            |            |             |             |
|---------------------------------|------------|------------|------------|------------|-------------|-------------|
| <b><math>\lambda</math>(nm)</b> | <b>514</b> | <b>553</b> | <b>658</b> | <b>986</b> | <b>1143</b> | <b>1298</b> |
| <b>A1</b>                       | -0.657     | -0.556     | 0.579      | 0.303      | 0.475       | 0.742       |
| <b><math>\tau</math>1(ps)</b>   | 2.55       | 2.18       | 17.2       | 3.38       | 198         | 269         |
| <b>A2</b>                       | -0.215     | -0.22      | 0.241      | 0.232      | 0.466       | 0.258       |
| <b><math>\tau</math>2(ps)</b>   | 171        | 287        | 225        | 66.3       | 1640        | inf         |
| <b>A3</b>                       | -0.129     | -0.224     | 0.172      | 0.375      | -0.0592     | 0           |
| <b><math>\tau</math>3(ps)</b>   | 940        | 1110       | 1120       | 1180       | inf         | 0           |
| <b>PCDTBT:PC[70]BM</b>          |            |            |            |            |             |             |
| <b><math>\lambda</math>(nm)</b> | <b>552</b> | <b>582</b> | <b>708</b> | <b>914</b> | <b>1095</b> |             |
| <b>A1</b>                       | -0.551     | -0.521     | 0.384      | 0.293      | 0.294       |             |
| <b><math>\tau</math>1(ps)</b>   | 1.98       | 1.26       | 0.86       | 3.48       | 27.5        |             |
| <b>A2</b>                       | -0.276     | -0.283     | 0.232      | 0.229      | 0.437       |             |
| <b><math>\tau</math>2(ps)</b>   | 398        | 729        | 75.5       | 65.6       | 630         |             |
| <b>A3</b>                       | -0.173     | -0.196     | 0.384      | 0.391      | 0.257       |             |
| <b><math>\tau</math>3(ps)</b>   | Inf        | Inf        | 1600       | 1260       | 1590        |             |

**Table S4** The lifetime of excited carriers and associated pre-exponential amplitude for PBDTT-DPP and PBDTT-DPP:PC[70]BM at different wavelength after multi-exponential fitting.

| <b>PBDTT-DPP</b>                |            |            |             |            |             |
|---------------------------------|------------|------------|-------------|------------|-------------|
| <b><math>\lambda</math>(nm)</b> | <b>637</b> | <b>679</b> | <b>742</b>  | <b>979</b> | <b>1167</b> |
| <b>A1</b>                       | -0.701     | -0.654     | -0.649      | 0.566      | 0.61        |
| <b><math>\tau</math>1(ps)</b>   | 0.447      | 1.42       | 1.63        | 2.55       | 2.75        |
| <b>A2</b>                       | -0.235     | -0.276     | -0.28       | 0.425      | 0.386       |
| <b><math>\tau</math>2(ps)</b>   | 9.73       | 28.2       | 35.9        | 31         | 36.7        |
| <b>A3 (offset)</b>              | -0.0636    | -0.0691    | -0.071      | 0.00885    | 0.00368     |
| <b>PBDTT-DPP:PC[70]BM</b>       |            |            |             |            |             |
| <b><math>\lambda</math>(nm)</b> | <b>745</b> | <b>928</b> | <b>1147</b> |            |             |
| <b>A1</b>                       | 0.596      | 0.631      | 0.481       |            |             |
| <b><math>\tau</math>1(ps)</b>   | 1.14       | 1.85       | 2.05        |            |             |
| <b>A2</b>                       | -0.313     | 0.269      | 0.466       |            |             |
| <b><math>\tau</math>2(ps)</b>   | 3.66       | 31.5       | 19.4        |            |             |
| <b>A3 (offset)</b>              | -0.0629    | 0.0996     | 0.053       |            |             |

**Table S5** The decay kinetics of PC[60]BM at different wavelength according to figure 9.

| <b>PC[60]BM</b>                 |            |            |            |            |            |             |
|---------------------------------|------------|------------|------------|------------|------------|-------------|
| <b><math>\lambda</math>(nm)</b> | <b>452</b> | <b>498</b> | <b>617</b> | <b>725</b> | <b>880</b> | <b>1099</b> |
| <b>A1</b>                       | 0.339      | 0.304      | 0.168      | 0.188      | 0.0774     | 0.0725      |
| <b><math>\tau</math>1(ps)</b>   | 48.6       | 70.5       | 82.4       | 91.4       | 1.1        | 3.11        |
| <b>A2</b>                       | 0.305      | 0.326      | 0.16       | 0.143      | 0.253      | 0.281       |
| <b><math>\tau</math>2(ps)</b>   | 680        | 1060       | 1340       | 1010       | 40.9       | 58.8        |
| <b>A3</b>                       | 0.355      | 0.37       | 0.672      | 0.669      | 0.552      | 0.507       |
| <b><math>\tau</math>3(ps)</b>   | inf        | inf        | inf        | inf        | 1190       | 1160        |

**Table S6** The decay kinetics of PC[70]BM at different wavelength according to figure 10.

| <b>PC[70]BM</b>                 |            |            |            |             |
|---------------------------------|------------|------------|------------|-------------|
| <b><math>\lambda</math>(nm)</b> | <b>530</b> | <b>719</b> | <b>873</b> | <b>1092</b> |
| <b>A1</b>                       | 0.4228     | 0.4255     | 0.3449     | 0.4723      |
| <b><math>\tau</math>1(ps)</b>   | 104        | 136        | 31.7       | 22.8        |
| <b>A2</b>                       | 0.221      | 0.199      | 0.4        | 0.25        |
| <b><math>\tau</math>2(ps)</b>   | 646        | 972        | 495        | 1430        |
| <b>A3</b>                       | 0.265      | 0.198      | 0.295      | 0.491       |
| <b><math>\tau</math>3(ps)</b>   | inf        | inf        | inf        | inf         |
